# Supplementary material for: Genomic DNA k-mer spectra: models and modalities
Source: PubMed Central journal article supplement (PMC2784323; doi:10.1186/gb-2009-10-10-r108), 2009-10-08

Human, k=9

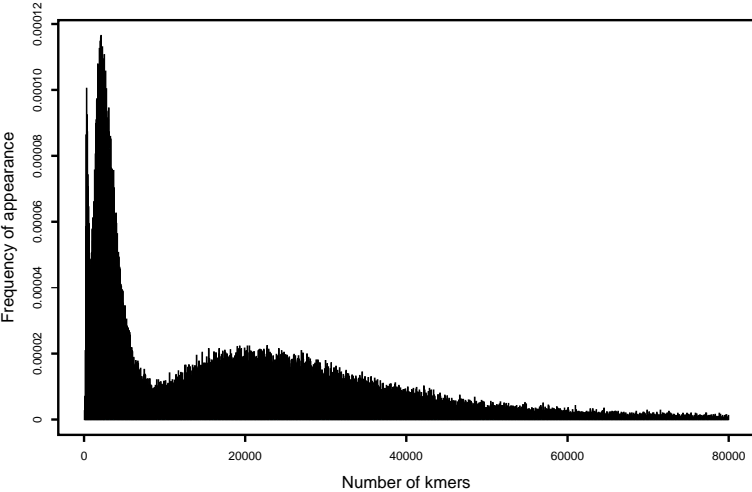

Human, k=11

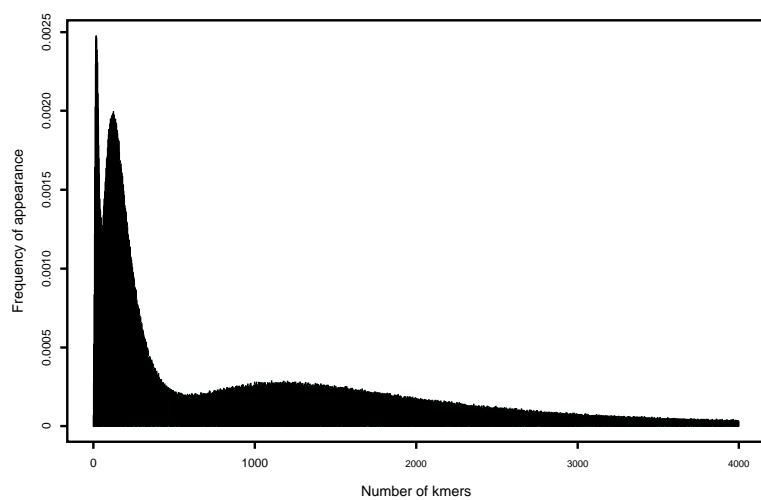

Opossum, k=9

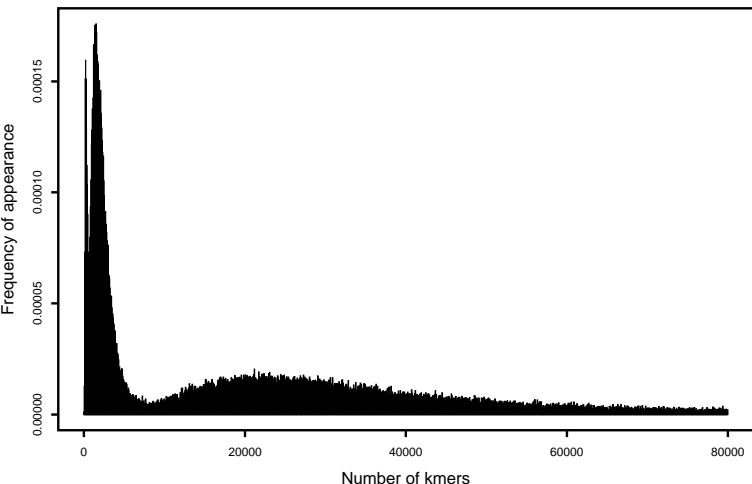

Opossum, k=11

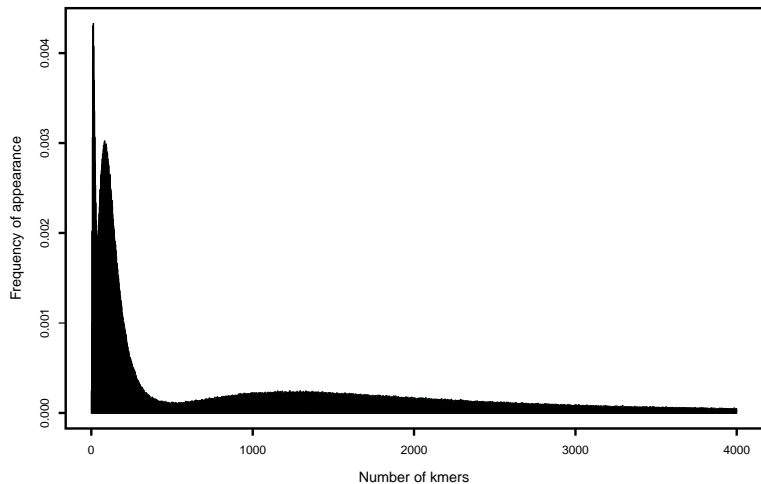

Supplement: gb-2009-10-10-r108-S2.pdf [file gb-2009-10-10-r108-S2.pdf]
