# Supplementary material for: Genomic DNA k-mer spectra: models and modalities
Source: PubMed Central journal article supplement (PMC2784323; doi:10.1186/gb-2009-10-10-r108), 2009-10-08
Supplement: gb-2009-10-10-r108-S7.pdf [file gb-2009-10-10-r108-S7.pdf]

# Table 1 - Genomes and Web Sites Used

The following tables list the organisms whose genomes were used in this study, along with additional information about each of them: taxonomical classification, usable length, percentage C+G content, CpG suppression (measured by  $\rho_{CG}$ ) and whether the  $k$ -mer spectrum is observed to have uni-modal or multi-modal behaviour.

Genomic data of the different species was downloaded from the following sites:

- **Ensemble ftp site** [22]
- **NCBI ftp site** [23]
- **TIGR ftp site** [24]
- **UCSC website** [25]
- **HGSC ftp site** [26]
- **Genoscope website** [27]

Data corresponding to various human functional genomic regions was downloaded from:

- **Human exons and introns** [28]
- **Human 3'UTRs and 5'UTRs** [29]
- **Human gene promoters** [30]

For some species referred to in this work, fully assembled genomes were not available. In such cases we used the available material (contigs, scaffolds, etc), making the assumption that the final assemblies will not differ significantly from these preliminary files in terms of the  $k$ -mer statistics.

| Species (Archea)                    | Classification | Length    | %G+C | $\rho_{CG}$ | dist. type |
|-------------------------------------|----------------|-----------|------|-------------|------------|
| AeropyrumPernix                     | Archea         | 1,509,911 | 56.5 | 0.70        | unimodal   |
| ArchaeoglobusFulgidus               | Archea         | 2,076,061 | 48.6 | 0.78        | unimodal   |
| HaloarculaMarismortui               | Archea         | 3,208,489 | 62.0 | 1.32        | unimodal   |
| HalobacteriumSp                     | Archea         | 1,887,389 | 68.0 | 1.36        | unimodal   |
| HaloquadratumWalsbyi                | Archea         | 2,925,353 | 47.9 | 1.11        | unimodal   |
| HyperthermusButylicus               | Archea         | 1,509,911 | 53.8 | 0.77        | unimodal   |
| MethanobacteriumThermoautotrophicum | Archea         | 1,604,247 | 49.6 | 0.51        | unimodal   |
| MethanococcoidesBurtonii            | Archea         | 2,453,539 | 40.8 | 0.72        | unimodal   |
| MethanococcusJannaschii             | Archea         | 1,604,238 | 31.4 | 0.32        | unimodal   |
| MethanococcusMaripaludis            | Archea         | 1,509,911 | 33.1 | 0.89        | unimodal   |
| MethanocorpusculumLabreanum         | Archea         | 1,698,650 | 50.1 | 1.19        | unimodal   |
| MethanopyrusKandleri                | Archea         | 1,604,247 | 61.2 | 1.18        | unimodal   |
| MethanosaetaThermophila             | Archea         | 1,792,986 | 53.5 | 0.86        | unimodal   |
| MethanosarcinaAcetivorans           | Archea         | 5,473,296 | 42.7 | 0.79        | unimodal   |
| MethanosarcinaBarkeri               | Archea         | 4,624,004 | 39.3 | 0.72        | unimodal   |
| MethanosarcinaMazei                 | Archea         | 3,869,048 | 41.5 | 0.72        | unimodal   |
| MethanosphaeraStadtmanae            | Archea         | 1,604,247 | 27.6 | 0.27        | unimodal   |
| MethanospirillumHungatei            | Archea         | 3,302,831 | 45.1 | 0.77        | unimodal   |
| NanoarchaeumEquitans                | Archea         | 377,477   | 31.1 | 0.61        | unimodal   |
| NatronomonasPharaonis               | Archea         | 2,453,539 | 63.4 | 1.39        | unimodal   |
| PicrophilusTorridus                 | Archea         | 1,415,508 | 36.0 | 0.76        | unimodal   |
| PyrobaculumAerophilum               | Archea         | 2,076,061 | 51.3 | 0.97        | unimodal   |
| PyrobaculumIslandicum               | Archea         | 1,698,650 | 49.5 | 0.93        | unimodal   |
| PyrococcusAbyssi                    | Archea         | 1,604,247 | 44.7 | 0.71        | unimodal   |
| PyrococcusFuriosus                  | Archea         | 1,792,986 | 40.8 | 0.50        | unimodal   |
| PyrococcusHorikoshii                | Archea         | 1,604,247 | 41.9 | 0.61        | unimodal   |
| SulfolobusAcidocaldarius            | Archea         | 2,076,061 | 36.7 | 0.55        | unimodal   |
| SulfolobusSolfataricus              | Archea         | 2,831,017 | 35.8 | 0.67        | unimodal   |
| SulfolobusTokodaii                  | Archea         | 2,547,942 | 32.8 | 0.55        | unimodal   |
| ThermococcusKodakaraensis           | Archea         | 1,981,725 | 52.0 | 0.88        | unimodal   |
| ThermofilumPendens                  | Archea         | 1,698,650 | 57.7 | 1.00        | unimodal   |
| ThermoplasmaAcidophilum             | Archea         | 1,415,508 | 45.9 | 0.91        | unimodal   |
| ThermoplasmaVolcanium               | Archea         | 1,509,911 | 39.9 | 0.83        | unimodal   |

| Species (Bacteria)                       | Classification      | Length     | %G+C | $\rho_{CG}$ | dist. type |
|------------------------------------------|---------------------|------------|------|-------------|------------|
| AcidobacteriaBacteriumEllin345           | Bacteria            | 5,378,893  | 58.4 | 1.27        | unimodal   |
| BacillusSubtilis                         | Bacteria            | 3,963,384  | 43.5 | 1.04        | unimodal   |
| BrucellaMelitensis                       | Bacteria            | 3,114,055  | 57.2 | 1.20        | unimodal   |
| BurkholderiaXenovoransLB400              | Bacteria            | 9,247,928  | 62.6 | 1.38        | unimodal   |
| ChlamydophilaPneumoniaeAR39              | Bacteria            | 1,132,366  | 40.6 | 0.73        | unimodal   |
| ChlorobiumTepidumTLS                     | Bacteria            | 1,981,718  | 56.5 | 1.21        | unimodal   |
| ChromobacteriumViolaceum                 | Bacteria            | 4,529,601  | 64.8 | 1.12        | unimodal   |
| CyanobacteriaBacteriumYellowstoneA-Prime | Bacteria            | 2,736,681  | 60.2 | 0.74        | unimodal   |
| EscherichiaColi536                       | Bacteria            | 4,718,340  | 50.5 | 1.14        | unimodal   |
| FrancisellaTularensisHolarctica          | Bacteria            | 1,792,986  | 32.2 | 0.54        | unimodal   |
| GeobacterSulfurreducens                  | Bacteria            | 3,585,973  | 60.9 | 1.00        | unimodal   |
| HelicobacterHepaticus                    | Bacteria            | 1,698,650  | 35.9 | 0.70        | unimodal   |
| IdiomarinaLoihiensisL2TR                 | Bacteria            | 2,642,278  | 47.1 | 1.06        | unimodal   |
| LactobacillusPlantarum                   | Bacteria            | 3,114,092  | 44.5 | 1.12        | unimodal   |
| LegionellaPneumophilaLens                | Bacteria            | 3,208,092  | 38.4 | 0.73        | unimodal   |
| MagnetococcusMC-1                        | Bacteria            | 4,435,265  | 54.2 | 0.80        | unimodal   |
| MarinobacterAquaeoleiVT8                 | Bacteria            | 4,529,611  | 56.9 | 0.94        | unimodal   |
| MycobacteriumTuberculosis                | Bacteria            | 4,151,874  | 65.6 | 1.18        | unimodal   |
| NeisseriaMeningitidisFAM18               | Bacteria            | 2,076,061  | 51.6 | 1.31        | unimodal   |
| NitrobacterWinogradskyiNb-255            | Bacteria            | 3,208,495  | 62.1 | 1.33        | unimodal   |
| NostocSp                                 | Bacteria            | 6,888,767  | 41.3 | 0.78        | unimodal   |
| PhotobacteriumProfundumSS9               | Bacteria            | 6,039,402  | 41.8 | 0.99        | unimodal   |
| ProchlorococcusMarinusNATL2A             | Bacteria            | 1,698,650  | 35.1 | 0.57        | unimodal   |
| RalstoniaEutrophaH16                     | Bacteria            | 6,605,672  | 66.6 | 1.13        | unimodal   |
| SaccharophagusDegradans2-40              | Bacteria            | 4,812,743  | 45.8 | 1.08        | unimodal   |
| SalmonellaTyphi                          | Bacteria            | 4,907,083  | 51.9 | 1.23        | unimodal   |
| ShewanellaOneidensis                     | Bacteria            | 4,907,081  | 45.9 | 1.00        | unimodal   |
| ShigellaDysenteriae                      | Bacteria            | 4,340,901  | 51.0 | 1.13        | unimodal   |
| StreptococcusMutans                      | Bacteria            | 1,887,389  | 36.9 | 0.71        | unimodal   |
| ThermoanaerobacterTengcongensis          | Bacteria            | 2,547,942  | 37.6 | 0.52        | unimodal   |
| VibrioCholerae                           | Bacteria            | 3,774,608  | 47.5 | 1.04        | unimodal   |
| ZymomonasMobilisZM4                      | Bacteria            | 1,887,389  | 46.2 | 1.10        | unimodal   |
| PlasmodiumFalciparum (malaria)           | Bacteria (Protozoa) | 21,798,142 | 19.4 | 0.76        | unimodal   |
| TetrahymenaThermophila                   | Bacteria (Protozoa) | 98,669,430 | 22.3 | 0.44        | unimodal   |
| LeishmaniaMajor                          | Bacteria (Protozoa) | 31,116,157 | 59.7 | 1.02        | unimodal   |
| EntamoebaHistolytica                     | Bacteria (Protozoa) | 12,298,665 | 33.6 | 0.30        | unimodal   |

| Species (Eukaryotes)                | Classification | Length        | %G+C | $\rho_{CG}$ | dist. type  |
|-------------------------------------|----------------|---------------|------|-------------|-------------|
| CaenorhabditisElegans (worm)        | Nematode       | 95,970,454    | 35.4 | 0.99        | unimodal    |
| SaccharomycesCerevisiae (yeast)     | Fungi          | 11,512,682    | 38.3 | 0.80        | unimodal    |
| CandidaGlabrata (haploid yeast)     | Fungi          | 11,700,869    | 38.6 | 0.66        | unimodal    |
| BiomphalariaGlabrata (mollusca)     | Mollusk        | 48,845,378    | 39.1 | 0.75        | unimodal    |
| CionaIntestinalis (sea squirt)      | Tunicate       | 83,180,064    | 35.6 | 0.86        | unimodal    |
| ArabidopsisThaliana (arabidopsis)   | Plant          | 113,813,113   | 36.0 | 0.72        | unimodal    |
| OryzaSativa (rice)                  | Plant          | 385,822,552   | 43.5 | 0.87        | unimodal    |
| VitisVinifera (grape)               | Plant          | 468,739,222   | 34.6 | 0.43        | unimodal    |
| DrosophilaMelanogaster (fly)        | Insect         | 115,134,437   | 42.4 | 0.93        | unimodal    |
| AnophelesGambiae (mosquito)         | Insect         | 213,534,127   | 44.6 | 1.07        | unimodal    |
| ApisMellifera (bee)                 | Insect         | 175,355,887   | 34.9 | 1.64        | unimodal    |
| TriboliumCastaneum (beetle)         | Insect         | 145,486,340   | 33.9 | 1.15        | unimodal    |
| DanioRerio (zebrafish)              | Bony Fish      | 996,230,784   | 36.3 | 0.52        | unimodal    |
| TakifuguRubripes (fugu)             | Bony Fish      | 329,961,080   | 45.5 | 0.57        | unimodal    |
| TetraodonNigroviridis (pufferfish)  | Bony Fish      | 177,300,831   | 45.9 | 0.60        | unimodal    |
| GasterosteusAculeatus (stickleback) | Bony Fish      | 424,233,346   | 44.6 | 0.66        | unimodal    |
| OryziasLatipes (Japanese Medaka)    | Bony Fish      | 552,716,066   | 40.1 | 0.48        | unimodal    |
| AnolisCarolinensis (lizard)         | Reptile        | 1,676,035,836 | 40.4 | 0.30        | multi-modal |
| XenopusTropicalis (frog)            | Amphibian      | 1,288,438,558 | 40.0 | 0.34        | multi-modal |
| GallusGallus (chicken)              | Bird           | 942,474,046   | 41.3 | 0.24        | multi-modal |
| OrnithorhynchusAnatinus (platypus)  | Mammal         | 388,840,627   | 43.3 | 0.30        | multi-modal |
| BosTaurus (cow)                     | Mammal         | 1,408,036,795 | 42.8 | 0.25        | multi-modal |
| CanisFamiliaris (dog)               | Mammal         | 2,187,364,344 | 41.1 | 0.26        | multi-modal |
| RattusNorvegicus (rat)              | Mammal         | 2,327,934,313 | 42.1 | 0.22        | multi-modal |
| MacacaMulatta (rhesus monkey)       | Mammal         | 2,503,126,668 | 40.9 | 0.25        | multi-modal |
| MonodelphisDomestica (opossum)      | Mammal         | 3,287,333,976 | 37.6 | 0.13        | multi-modal |
| MusMusculus (mouse)                 | Mammal         | 2,387,461,979 | 41.9 | 0.19        | multi-modal |
| PanTrogodytes (chimpanzee)          | Mammal         | 2,596,334,645 | 40.8 | 0.23        | multi-modal |
| HomoSapiens (human)                 | Mammal         | 2,735,501,651 | 40.9 | 0.24        | multi-modal |
| HumanIntrons (human regions)        |                | 1,368,981,774 | 41.5 | 0.24        | multi-modal |
| Human3'UTR (human regions)          |                | 30,577,457    | 44.4 | 0.29        | multi-modal |
| HumanExons (human regions)          |                | 108,962,293   | 49.9 | 0.44        | unimodal    |
| Human5'UTR (human regions)          |                | 10,160,999    | 55.4 | 0.60        | unimodal    |
| HumanPromoters600 (human regions)   |                | 1,025,512     | 58.8 | 0.74        | unimodal    |
| HumanPromoters1000 (human regions)  |                | 1,762,896     | 53.7 | 0.64        | unimodal    |
| HumanPromoters5000 (human regions)  |                | 8,753,016     | 47.3 | 0.39        | multi-modal |
